# Supplementary material for: Chrysoberyl from the Sabatini Volcanic Complex (Latium, Italy): chemical and petrological peculiarities
Source: Copernicus journal article supplement (doi:10.5194/ejm-37-483-2025), 2025-07-21
Supplement: Supplementary file 1 [file ejm-37-483-2025-supplement.zip]

## **S1 LA-ICP-MS analytical techniques and complete analyses**

### **S1.1 In-situ LA-ICP-MS elemental analysis**

The LA-ICP-MS analyses on chrysoberyl grains (Table S2) were performed at the Science department, Roma Tre University LA-ICP-MS lab using a Teledyne Photon Machine Analyte Excite (193 nm) + ArF excimer laser ablation system coupled to a Thermo-Scientific iCAP RQ (Single Quad). All analyses were performed at low oxide production rates ( $^{232}\text{Th} \cdot ^{16}\text{O}/^{232}\text{Th} < 0.5\%$ ). Helium carrier gas stream of  $\sim 0.5$  and  $0.3$  l/min are set for the cell and the cup, respectively. Laser spot sizes of  $\sim 35$   $\mu\text{m}$  and  $\sim 20$   $\mu\text{m}$  (circles' diameters) were used for glass standards and unknown samples, respectively, with a 7 Hz pulse repetition rate and an energy density of  $4 \text{ J/cm}^2$ .

The ablation time was set at 60 seconds comprises a background acquisition lasting 15 seconds, succeeded by a sample ablation period of 25 seconds, followed by a 20 second washout phase. The measured masses include  $^7\text{Li}$ ,  $^9\text{Be}$ ,  $^{11}\text{B}$ ,  $^{23}\text{Na}$ ,  $^{24}\text{Mg}$ ,  $^{27}\text{Al}$ ,  $^{29}\text{Si}$ ,  $^{31}\text{P}$ ,  $^{33}\text{S}$ ,  $^{44}\text{Ca}$ ,  $^{49}\text{Ti}$ ,  $^{51}\text{V}$ ,  $^{52}\text{Cr}$ ,  $^{55}\text{Mn}$ ,  $^{57}\text{Fe}$ ,  $^{66}\text{Zn}$ ,  $^{71}\text{Ga}$ ,  $^{73}\text{Ge}$ ,  $^{75}\text{As}$ ,  $^{85}\text{Rb}$ ,  $^{88}\text{Sr}$ ,  $^{89}\text{Y}$ ,  $^{90}\text{Zr}$ ,  $^{93}\text{Nb}$ ,  $^{118}\text{Sn}$ ,  $^{139}\text{La}$ ,  $^{140}\text{Ce}$ ,  $^{141}\text{Pr}$ ,  $^{146}\text{Nd}$ ,  $^{147}\text{Sm}$ ,  $^{153}\text{Eu}$ ,  $^{157}\text{Gd}$ ,  $^{159}\text{Tb}$ ,  $^{163}\text{Dy}$ ,  $^{165}\text{Ho}$ ,  $^{166}\text{Er}$ ,  $^{159}\text{Tm}$ ,  $^{172}\text{Yb}$ ,  $^{175}\text{Lu}$ ,  $^{181}\text{Ta}$ ,  $^{208}\text{Pb}$ ,  $^{232}\text{Th}$ ,  $^{238}\text{U}$ . The dwell times are 2-3 ms for the major elements' masses and 4 ms for the rest. Synthetic glass NIST-SRM-612 and NIST-SRM-610 reference material (Jochum et al., 2011) were used to bracket analyses of unknowns, both used as external calibration, drift correction and quality control. In fact, for elements with concentrations exceeding double those in NIST-SRM-612, NIST-SRM-610 was employed.

As for elemental calibration the Iolite software version 4.8.6 (Paton et al., 2011) was used for data reduction and calibrations. both background subtraction and drift corrections are made using a step forward factor determined from repeat analysis. The stoichiometric Be, Al, and

Fe oxide contents of 100 wt.% of in chrysoberyl was used as the internal standard for LA-ICP-MS calibration.

The limit of detection (LOD, Table S1) was determined for each element using the following:

$$\text{LOD} = 3 \times (\text{STDev background signal}) / \text{Sensitivity (per analyte element, per session)}$$

Where 'STDev background signal' is the standard deviation of the signal for a given element collected before ablation for each sample (gas blank), and 'Sensitivity' is the calibrated sensitivity determined from used reference glasses.

**Table S1:** Limits of detections (LOD; µg/g) for elemental analysis for measured elements in the chrysoberyl samples (~20 µm diameters ablation spots)

|       |       |       |        |       |       |       |        |       |       |       |       |       |       |       |       |
|-------|-------|-------|--------|-------|-------|-------|--------|-------|-------|-------|-------|-------|-------|-------|-------|
| Li7   | Be9   | B11   | Na23   | Mg24  | Al27  | Si29  | P31    | S33   | Ca44  | Ti49  | V51   | Cr52  | Mn55  | Fe57  | Zn66  |
| 5.11  | 2.36  | 11.29 | 238.42 | 0.36  | 55.56 | 12.38 | 371.22 | 9,367 | 1,270 | 32.45 | 4.87  | 33.73 | 4.48  | 304.8 | 43.15 |
| Ga71  | Ge73  | As75  | Rb85   | Sr88  | Y89   | Zr90  | Nb93   | Sn118 | La139 | Ce140 | Nd146 | Sm147 | Eu153 | Gd157 | Tb159 |
| 1.51  | 16.59 | 12.65 | 1.11   | 0.18  | 0.06  | 0.13  | 0.08   | 5.99  | 0.04  | 0.04  | 0.19  | 0.22  | 0.06  | 0.21  | 0.03  |
| Dy163 | Ho165 | Er166 | Tm169  | Yb172 | Hf178 | Ta181 | W182   | Pb208 | Th232 | U238  |       |       |       |       |       |
| 0.12  | 0.03  | 0.09  | 0.03   | 0.13  | 0.09  | 0.03  | 0.13   | 0.68  | 0.03  | 0.03  |       |       |       |       |       |

The calculated precisions using NIST610 glass standard (Jochum et al., 2011) which was measured at the beginning and end of each 6-8 unknown samples bracket are mainly below 10% except for B, S and Fe due to various isotopic and molecular interferences.

## REFERENCES

- Jochum, K.P., Weis, U., Stoll, B., Kuzmin, D., Yang, Q., Raczek, I., Jacob, D.E., Stracke, A., Birbaum, K. and Frick, D.A.,: Determination of reference values for NIST SRM 610–617 glasses following ISO guidelines. *Geostandards and Geoanalytical Research*, 35(4): 397-429, 2011.
- Paton, C., Hellstrom, J., Paul, B., Woodhead, J. and Hergt, J.: Iolite: Freeware for the visualisation and processing of mass spectrometric data. *Journal of Analytical Atomic Spectrometry*, 26(12): 2508-2518, 2011.

**Table S2.** Complete LA-ICP-MS analyses for chrysoberyl samples (µg/g)

|              | <b>C1_1</b> | <b>C1_2</b> | <b>C1_3</b> | <b>C1_4</b> | <b>C1_5</b> | <b>C1_6</b> | <b>min</b> | <b>max</b> | <b>average</b> |
|--------------|-------------|-------------|-------------|-------------|-------------|-------------|------------|------------|----------------|
| <b>Li7</b>   | 3.18        | bdl         | bdl         | bdl         | bdl         | bdl         | bdl        | 3.18       | 0.53           |
| <b>Be9</b>   | 71617.73    | 70491.67    | 73262.91    | 70384.19    | 71529.15    | 68757.29    | 68757.29   | 73262.91   | 71007.16       |
| <b>B11</b>   | 68.18       | 66.57       | 52.60       | 64.99       | 81.99       | 77.82       | 52.60      | 81.99      | 68.69          |
| <b>Na23</b>  | bdl         | bdl         | bdl         | bdl         | bdl         | bdl         | bdl        | bdl        | bdl            |
| <b>Mg24</b>  | 192.76      | 179.75      | 153.14      | 155.65      | 193.81      | 141.27      | 141.27     | 193.81     | 169.40         |
| <b>Al27</b>  | 377305.4    | 373311.2    | 376519.6    | 367012.4    | 352111.9    | 365908.9    | 352111.9   | 377305.4   | 368694.9       |
| <b>Si29</b>  | bdl         | bdl         | bdl         | bdl         | bdl         | bdl         | bdl        | bdl        | bdl            |
| <b>P31</b>   | bdl         | bdl         | bdl         | bdl         | bdl         | bdl         | bdl        | bdl        | bdl            |
| <b>Ca44</b>  | bdl         | bdl         | bdl         | bdl         | bdl         | bdl         | bdl        | bdl        | bdl            |
| <b>Ti49</b>  | 1373.91     | 760.46      | 5027.72     | 602.15      | 964.04      | 2437.54     | 602.15     | 5027.72    | 1860.97        |
| <b>V51</b>   | 144.45      | 173.30      | 177.31      | 187.72      | 248.31      | 232.06      | 144.45     | 248.31     | 193.86         |
| <b>Cr52</b>  | bdl         | bdl         | bdl         | bdl         | bdl         | bdl         | bdl        | bdl        | bdl            |
| <b>Mn55</b>  | 51.51       | 50.93       | 50.12       | 51.37       | 102.26      | 91.40       | 50.12      | 102.26     | 66.26          |
| <b>Fe57</b>  | 66182.57    | 70386.21    | 62882.93    | 79547.29    | 100941.7    | 84718.13    | 62882.93   | 100941.70  | 77443.14       |
| <b>Co59</b>  | 1.03        | 0.42        | 1.01        | bdl         | bdl         | bdl         | bdl        | 1.03       | 0.41           |
| <b>Zn66</b>  | 118.12      | 101.28      | 157.77      | 135.37      | 212.09      | 127.21      | 101.28     | 212.09     | 141.97         |
| <b>Ga71</b>  | 1035.06     | 1125.89     | 1103.93     | 1168.64     | 1285.98     | 1106.45     | 1035.06    | 1285.98    | 1137.66        |
| <b>Ge73</b>  | bdl         | bdl         | bdl         | bdl         | bdl         | bdl         | bdl        | bdl        | bdl            |
| <b>As75</b>  | bdl         | bdl         | bdl         | bdl         | 0.92        | bdl         | bdl        | 0.92       | 0.15           |
| <b>Rb85</b>  | 0.10        | 0.58        | bdl         | bdl         | bdl         | bdl         | bdl        | 0.58       | 0.11           |
| <b>Sr88</b>  | bdl         | bdl         | bdl         | bdl         | bdl         | bdl         | bdl        | bdl        | bdl            |
| <b>Y89</b>   | bdl         | bdl         | bdl         | bdl         | bdl         | bdl         | bdl        | bdl        | bdl            |
| <b>Zr90</b>  | 0.54        | bdl         | bdl         | 0.17        | 6.41        | 1.26        | bdl        | 6.41       | 1.40           |
| <b>Nb93</b>  | bdl         | 0.13        | 0.86        | 0.38        | 7.68        | 0.73        | bdl        | 7.68       | 1.63           |
| <b>Sn118</b> | 301.17      | 254.00      | 604.56      | 177.60      | 183.02      | 544.25      | 177.60     | 604.56     | 344.10         |
| <b>La139</b> | bdl         | bdl         | bdl         | bdl         | 1.55        | bdl         | bdl        | 1.55       | 0.26           |
| <b>Ce140</b> | bdl         | bdl         | bdl         | bdl         | 1.08        | bdl         | bdl        | 1.08       | 0.18           |
| <b>Nd146</b> | bdl         | bdl         | bdl         | bdl         | bdl         | bdl         | bdl        | bdl        | bdl            |
| <b>Sm147</b> | bdl         | bdl         | bdl         | bdl         | bdl         | bdl         | bdl        | bdl        | bdl            |
| <b>Eu153</b> | bdl         | bdl         | bdl         | bdl         | bdl         | bdl         | bdl        | bdl        | bdl            |
| <b>Gd157</b> | bdl         | bdl         | bdl         | bdl         | bdl         | bdl         | bdl        | bdl        | bdl            |
| <b>Tb159</b> | bdl         | bdl         | bdl         | bdl         | bdl         | bdl         | bdl        | bdl        | bdl            |
| <b>Dy163</b> | bdl         | bdl         | bdl         | bdl         | bdl         | bdl         | bdl        | bdl        | bdl            |
| <b>Ho165</b> | bdl         | bdl         | bdl         | bdl         | bdl         | bdl         | bdl        | bdl        | bdl            |
| <b>Er166</b> | bdl         | bdl         | bdl         | bdl         | bdl         | bdl         | bdl        | bdl        | bdl            |
| <b>Tm169</b> | bdl         | bdl         | bdl         | bdl         | bdl         | bdl         | bdl        | bdl        | bdl            |
| <b>Yb172</b> | bdl         | bdl         | bdl         | bdl         | bdl         | bdl         | bdl        | bdl        | bdl            |
| <b>Hf178</b> | bdl         | bdl         | 0.82        | bdl         | bdl         | 0.20        | bdl        | 0.82       | 0.17           |
| <b>Ta181</b> | 6.18        | 3.39        | 21.71       | 0.85        | 3.71        | 11.58       | 0.85       | 21.71      | 7.90           |
| <b>W182</b>  | bdl         | bdl         | bdl         | bdl         | bdl         | bdl         | bdl        | bdl        | bdl            |
| <b>Pb206</b> | bdl         | bdl         | bdl         | bdl         | bdl         | bdl         | bdl        | bdl        | bdl            |
| <b>Pb207</b> | bdl         | bdl         | bdl         | bdl         | bdl         | bdl         | bdl        | bdl        | bdl            |
| <b>Pb208</b> | bdl         | bdl         | bdl         | bdl         | bdl         | bdl         | bdl        | bdl        | bdl            |
| <b>Th232</b> | bdl         | bdl         | bdl         | bdl         | 0.03        | bdl         | bdl        | 0.03       | 0.01           |
| <b>U235</b>  | bdl         | bdl         | bdl         | bdl         | bdl         | bdl         | bdl        | bdl        | bdl            |
| <b>U238</b>  | bdl         | bdl         | bdl         | bdl         | 0.08        | bdl         | bdl        | 0.08       | 0.01           |
