# Supplementary material for: Chrysoberyl from the Sabatini Volcanic Complex (Latium, Italy): chemical and petrological peculiarities
Source: Copernicus journal article supplement (doi:10.5194/ejm-37-483-2025), 2025-07-21
Supplement: Supplementary file 2 [file ejm-37-483-2025-supplement.zip]

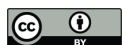

*Supplement of*

**Chrysoberyl from the Sabatini Volcanic Complex (Latium, Italy): chemical and petrological peculiarities**

**Giuseppe Illuminati et al.**

*Correspondence to:* Giuseppe Illuminati ([giu.illuminati@stud.uniroma3.it](mailto:giu.illuminati@stud.uniroma3.it)) and Fabio Bellatreccia ([fabio.bellatreccia@uniroma3.it](mailto:fabio.bellatreccia@uniroma3.it))

- [ejm-37-483-2025-supplement-title-page.pdf](#)
- [Chrysoberyl.cif](#)
- [LA-ICP-MS Supplementary.pdf](#)
- [shelxt\\_a.fcf](#)
- [shelxt\\_a.hkl](#)

The copyright of individual parts of the supplement might differ from the article licence.
